# Supplementary material
Source: Springer Nature journal article supplement (https://www.springerprofessional.de/resource/supplementary/13638_2013_734_MOESM4_ESM.pdf/11898370)

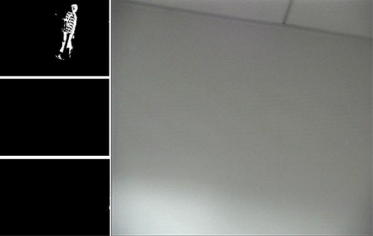

**(a)**

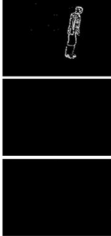

**(b)**

Supplement: MOESM4 [file 11898370]
